# Supplementary material for: Electrophysiological Studies on The Dynamics of Luminance Adaptation in the Mouse Retina
Source: Vision (Basel). 2017 Oct 17;1(4):23. doi: 10.3390/vision1040023 (PMC6835873; doi:10.3390/vision1040023)
Supplement: Supplementary file 1 [file vision-01-00023-s001.docx]

Electrophysiological Studies On The Dynamics Of Luminance Adaptation In The Mouse Retina

Anneka Joachimsthaler 1,2, Tina I. Tsai 1,2, Jan Kremers 1,*

1 Department of Ophthamlology, University Hospital Erlangen, 91054 Erlangen, Germany; anneka.joachimsthaler@uk-erlangen.de (A.J.); tina.tsai@uk-erlangen.de (T.I.T.)

2 Department of Biology, Animal Physiology, FAU Erlangen-Nürnberg, 91058 Erlangen, Germany

***** Correspondence: Jan.Kremers@uk-erlangen.de

Supplementary data

**T**able S1: Summary of the parameters fits for the light adaptation flash data. The fitting parameters for data of protocol 1 have a gray background; the data without a background stem from protocol 2. Units of the different parameters are given for amplitude and latency in the table heading.

| **ERG component** | | **Fitting function** | **y0**  **[µV]; [ms]** | **α**  **[µV*min-1]; [ms*min-1]** | **β**  **[min-1]** | **ε**  **[µV*min-1]; [ms*min-1]** | |
| --- | --- | --- | --- | --- | --- | --- | --- |
| b-wave | amplitude | y(t) = y0 + α (1 – e-βt) | 95.8 | 25.7 | 0.296 | |  |
| 87.2 | 4267.71 | 0.0011 | |  |
| latency | y(t) = y0 + α (1 – e-βt) | 42.8 | -3.6 | 0.152 | |  |
| 45.1 | -2.8 | 0.341 | |  |
| PhNR | amplitude | y(t) = y0 + α (1 – e-βt) | 15.5 | 14.3 | 0.166 | |  |
| 26.1 | 42.0 | 0.272 | |  |
| latency | y(t) = y0 + εt | 156.2 |  |  | | -0.905 |
| 166.5 |  |  | | -1.425 |
| 2nd OP peak | amplitude | y(t) = y0 + α (1 – e-βt) | 7.4 | 3.9 | 0.658 | |  |
| 1.6 | 1817.71 | 0.0011 | |  |
| latency | y(t) = y0 + α (1 – e-βt) | 62.6 | -2.7 | 0.093 | |  |
| 62.9 | -1.4 | 0.278 | |  |
| 3rd OP peak | amplitude | y(t) = y0 + εt | 20.5 |  |  | | 0.643 |
| 10.6 |  |  | | 1.615 |
| latency | y(t) = y0 + εt | 72.2 | -0.9 | 0.414 | |  |
| 71.3 | -5.1 | 0.096 | |  |
| all OP  (FFT analysis) | amplitude | y(t) = y0 + α (1 – e-βt) | 0.4 | 0.1 | 0.609 | |  |
| 0.5 | 0.2 | 0.450 | |  |

1 Response-adaptation profiles showed variable trends for the different animals. Therefore the fitting of the data was difficult and the fitting parameters are unlikely.

**T**able S2: Statistical analyses of the differences of the parameter value y(t0) and the change of the parameters during the first 5 min of light adaptation between the two different protocols. The data of protocol 1 (25 cd/m²) have a gray background. The data without a background stem from protocol 2. Units of the parameters are given for amplitude and latency in the table heading. The significance level was corrected after Bonferroni (nBonferroni=9).

| **ERG component** | | **background intensity** | **y(t0)[µV]; [ms]** | | **y(t5)-y(t0) [µV]; [ms]** | |
| --- | --- | --- | --- | --- | --- | --- |
| **mean ± sd** | **p-value** | **mean ± sd** | **p-value** |
| b-wave | amplitude | 25 cd/m² | 97.5 ± 28.1 | 0.721 | 27.0 ± 8.6 | 0.959 |
| 40 cd/m² | 87.9 ±12.3 | 18.6 ± 18.3 |
| latency | 25 cd/m² | 43.0 ± 1.7 | 0.0281 | -2.2 ± 1.0 | 0.798 |
| 40 cd/m² | 45.1 ± 1.6 | -2.2 ± 0.9 |
| PhNR | amplitude | 25 cd/m² | 18.4 ± 16.7 | 0.234 | 10.6 ± 17.0 | 0.328 |
| 40 cd/m² | 27.0 ± 16.2 | 31.0 ± 38.6 |
| latency | 25 cd/m² | 161.1 ± 26.2 | 0.422 | -12.6 ± 35.2 | 0.721 |
| 40 cd/m² | 168.2 ± 23.5 | -8.3 ± 21.4 |
| 2nd OP peak | amplitude | 25 cd/m² | 7.2 ± 5.3 | 0.613 | 4.1 ± 5.1 | 0.867 |
| 40 cd/m² | 5.7 ± 5.0 | 3.0 ± 7.7 |
| latency | 25 cd/m² | 61.6 ± 1.0 | 0.463 | 0.2 ± 1.3 | 0.232 |
| 40 cd/m² | 61.2 ± 1.0 | 0.7 ± 1.3 |
| 3rd OP peak | amplitude | 25 cd/m² | 18.0 ± 11.0 | 0.074 | 5.8 ± 11.4 | 0.888 |
| 40 cd/m² | 11.7 ± 6.8 | 7.5 ± 11.2 |
| latency | 25 cd/m² | 71.4 ± 1.1 | 0.222 | -2.1 ± 0.6 | 0.0451 |
| 40 cd/m² | 72.1 ± 1.3 | -0.5 ± 1.8 |
| all OP  (FFT analysis) | amplitude | 25 cd/m² | 0.5 ± 0.4 | 0.743 | 0.2 ± 0.3 | 0.236 |
| 40 cd/m² | 0.4 ± 0.1 | 0.1 ± 0.1 |

1 p-value was below significance level before Bonferroni correction

**T**able S3: Summary of the fitting parameters for the dark adaptation flash data. The fitting parameters for data of protocol 1 have a gray background; the data without a background stem from protocol 2.. Units of the different parameters are given for amplitude and latency in the table heading.

| **ERG component** | | **Fitting function** | **y0 or δ [µV]; [ms]** | **α [µV*min-1]; [ms*min-1]** | **β [min-1]** | **ε [µV*min-1]; [ms*min-1]** |
| --- | --- | --- | --- | --- | --- | --- |
| a-wave | amplitude | y(t) = y0 + α (1 - e-βt) | 46.9 | 41059.51 | 0.0001 |  |
| 17.1 | 402.6 | 0.029 |  |
| latency | y(t) = y0 + α (1 - e-βt) | 13.8 | 2.4 | 1.311 |  |
| 17.1 | -6.8 | 0.008 |  |
| b-wave | amplitude | y(t) = y0 + εt | 155.7 |  |  | 6.917 |
| 181.6 |  |  | 7.278 |
| latency | y(t) = y0 + εt | 41.0 |  |  | 0.227 |
| 46.2 |  |  | -0.032 |
| a-to-b ratio |  | y(t) = y0 + α (1 - e-βt) | 0.3 | 0.6 | 0.039 |  |
|  | 0.2 | 0.5 | 0.072 |  |
| 2nd OP peak | amplitude | y(t) = y0 + εt | 18.3 |  |  | 4.002 |
| 7.9 |  |  | 3.287 |
| latency | y(t) = y0 + εt | 55.1 |  |  | -0.092 |
| 55.3 |  |  | -0.076 |
| 3rd OP peak | amplitude | y(t) = δ + αeβt | -5.6 | 35.1 | 0.059 |  |
| -7.0 | 36.8 | 0.040 |  |
| latency | y(t) = y0 + α (1 - e-βt) | 66.7 | -10.1 | 0.024 |  |
| 78.6 | -17.5 | 0.109 |  |
| all OP  (FFT analysis) | amplitude | y(t) = δ + αeβt | 0.7 | 0.1 | 0.081 |  |
| 0.5 | 0.3 | 0.041 |  |

1 Response-adaptation profiles showed variable trends for the different animals. Therefore the fitting of the data was difficult and the resulting fitting parameters are unlikely.

**T**able S4: Statistical analyses of the differences of the parameter value y(t0) and the change of the parameters during the first 26 min of light adaptation between the two different protocols. The data of protocol 1 (25 cd/m²) have a gray background; the data without a background stem from protocol 2. . Units of the parameters are given for amplitude and latency in the table heading. The significance level was corrected after Bonferroni (nBonferroni=9).

| **ERG component** | | **background intensity** | **y(t0) [µV]; [ms]** | | **y(t26)-y(t0)**  **[µV]; [ms]** | |
| --- | --- | --- | --- | --- | --- | --- |
| **mean ± sd** | **p-value** | **mean ± sd** | **p-value** |
| a-wave | amplitude | 25 cd/m² | 47.3 ± 16.0 | 0.724 | 180.3 ± 45.4 | 0.368 |
| 40 cd/m² | 43.8 ± 38.7 | 201.5 ± 70.2 |
| latency | 25 cd/m² | 14.3 ± 3.9 | 0.435 | 2.6 ± 4.0 | 0.368 |
| 40 cd/m² | 15.9 ± 2.6 | 0.1 ± 2.9 |
| b-wave | amplitude | 25 cd/m² | 167.1 ± 31.6 | 0.435 | 148.0 ± 85.3 | 0.683 |
| 40 cd/m² | 184.9 ± 47.8 | 193.7 ± 80.5 |
| latency | 25 cd/m² | 42.5 ± 4.8 | 0.435 | 6.2 ± 8.2 | 0.214 |
| 40 cd/m² | 45.0 ± 6.4 | 0.0 ± 5.9 |
| a-to-b ratio |  | 25 cd/m² | 0.3 ± 0.1 | 0.724 | 0.4 ± 0.1 | 0.933 |
| 40 cd/m² | 0.2 ± 0.2 | 0.4 ± 0.2 |
| 2nd OP peak | amplitude | 25 cd/m² | 28.8 ± 11.1 | 0.222 | 112.8 ± 21.7 | 0.109 |
| 40 cd/m² | 21.5 ± 9.9 | 66.2 ± 37.9 |
| latency | 25 cd/m² | 52.8 ± 2.3 | 0.284 | -0.3 ± 4.1 | 0.461 |
| 40 cd/m² | 50.6 ± 3.8 | 2.6 ± 3.5 |
| 3rd OP peak | amplitude | 25 cd/m² | 43.2 ± 25.5 | 0.833 | 136.0 ± 43.9 | 0.0281 |
| 40 cd/m² | 40.1 ± 20.5 | 47.8 ± 45.6 |
| latency | 25 cd/m² | 62.8 ± 3.9 | 0.524 | 0.9 ± 5.2 | 0.283 |
| 40 cd/m² | 63.8 ± 4.6 | -2.6 ± 4.1 |
| all OP  (FFT analysis) | amplitude | 25 cd/m² | 1.0 ± 0.1 | 0.833 | 0.8 ± 0.4 | 0.283 |
| 40 cd/m² | 1.0 ± 0.3 | 0.4 ± 0.4 |

1 p-value was below significance level before Bonferroni correction

**T**able S5: Summary of fitting parameters for the flicker 1st harmonic. Units of the different parameters are given for amplitude and latency in the table heading.

| ERG component | | Fitting function | y0  [µV]; [ms] | α  [µV*min-1]; [ms*min-1] | β  [min-1] | ε  [µV*min-1]; [ms*min-1] |
| --- | --- | --- | --- | --- | --- | --- |
| high light level | amplitude | y(t) = y0 + α (1 - e-βt) | 0.7 | -42.9 | 0.001 |  |
| phase | y(t) = y0 + α (1 - e-βt) | 297.5 | -33.5 | 0.162 |  |
| low light level | amplitude | y(t) = y0 + αeβt | 0.1 | 0.0 | 0.119 |  |
| phase | y(t) = y0 + εt | 148.6 |  |  | 1.552 |
